# Supplementary material for: Switchable selectivity in an NHC-catalysed dearomatizing annulation reaction
Source: Springer Nature journal article supplement (doi:10.1038/nchem.2337), 2015-08-31

# <sup>1</sup>H NMR spectrum of 3k

Feb04-2015  
glo guo geh gc 76  
proton CDCl3 /opt/topsp1/av1

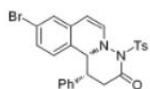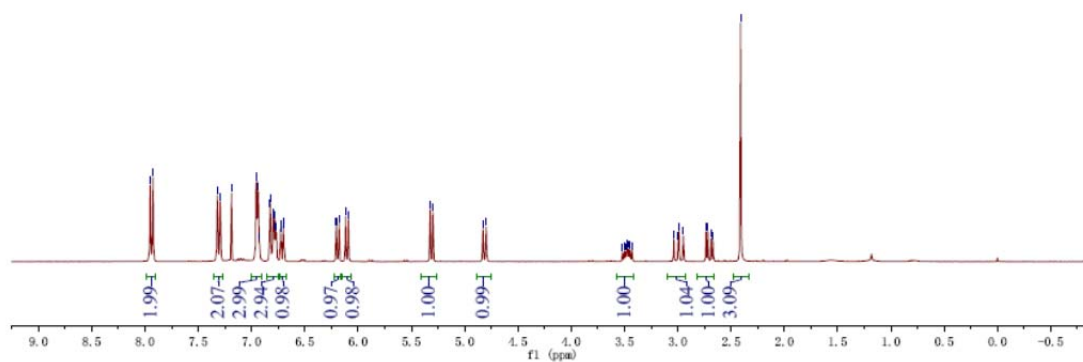

# <sup>13</sup>C NMR spectrum of 3k

Feb04-2015  
glo guo geh gc 76  
carbon\_256 CDCl3 /opt/topsp1/av1

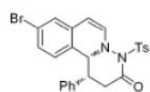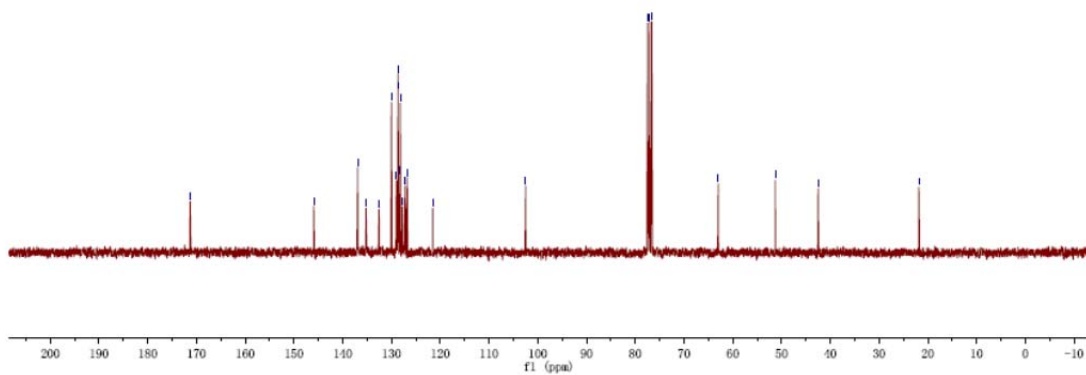

Supplement: 41557_2015_BFnchem2337_MOESM97_ESM.pdf [file 41557_2015_BFnchem2337_MOESM97_ESM.pdf]
