# Supplementary material for: Switchable selectivity in an NHC-catalysed dearomatizing annulation reaction
Source: Springer Nature journal article supplement (doi:10.1038/nchem.2337), 2015-08-31
Supplement: 41557_2015_BFnchem2337_MOESM98_ESM.pdf [file 41557_2015_BFnchem2337_MOESM98_ESM.pdf]

### Rac-3k

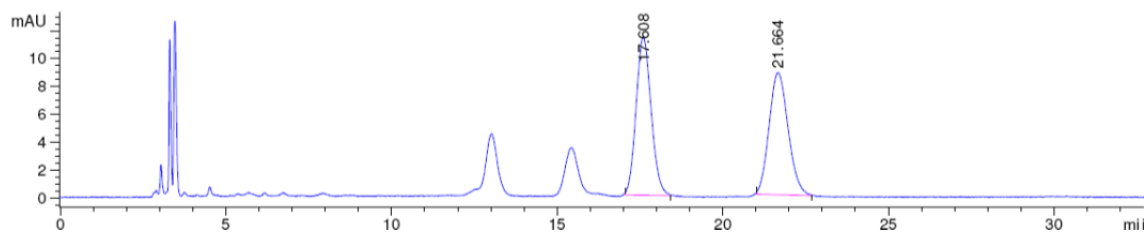

| Peak # | RetTime [min] | Type | Width [min] | Area [mAU*s] | Height [mAU] | Area %  |
|--------|---------------|------|-------------|--------------|--------------|---------|
| 1      | 17.608        | BB   | 0.4396      | 357.58490    | 11.31654     | 50.4748 |
| 2      | 21.664        | BB   | 0.4967      | 350.85754    | 8.78954      | 49.5252 |

Totals : 708.44244 20.10608

### Asy-3k

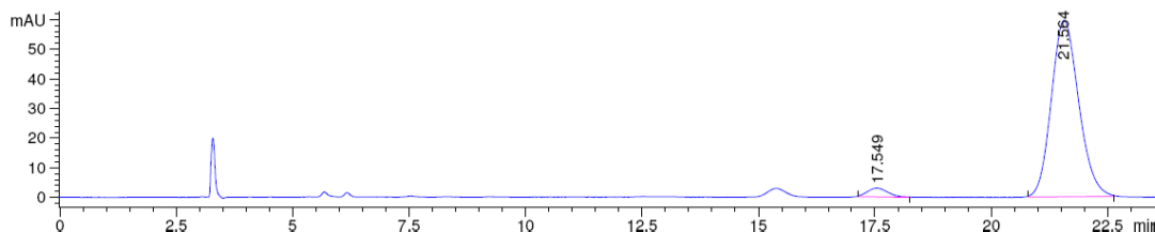

| Peak # | RetTime [min] | Type | Width [min] | Area [mAU*s] | Height [mAU] | Area %  |
|--------|---------------|------|-------------|--------------|--------------|---------|
| 1      | 17.549        | BB   | 0.3987      | 89.91299     | 2.95731      | 3.5625  |
| 2      | 21.564        | BB   | 0.6237      | 2433.96436   | 59.57097     | 96.4375 |

Totals : 2523.87735 62.52829
