# Supplementary material for: Switchable selectivity in an NHC-catalysed dearomatizing annulation reaction
Source: Springer Nature journal article supplement (doi:10.1038/nchem.2337), 2015-08-31

# <sup>1</sup>H NMR spectrum of **31**

Feb04-2015  
gio guo geh gc 77  
proton CDC13 /opt/topap

7.9641  
7.9385  
7.9419  
7.9363  
7.3304  
7.3036  
7.1888  
6.9526  
6.9488  
6.9379  
6.9302  
6.8105  
6.4410  
6.2190  
5.7457

4.8575  
4.8269  
3.5306  
3.5126  
3.5002  
3.4893  
3.4823  
3.4714  
3.4591  
3.4410  
3.0596  
3.0182  
3.0110  
2.9696  
2.7662  
2.7481  
2.7176  
2.6995  
2.4178

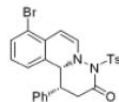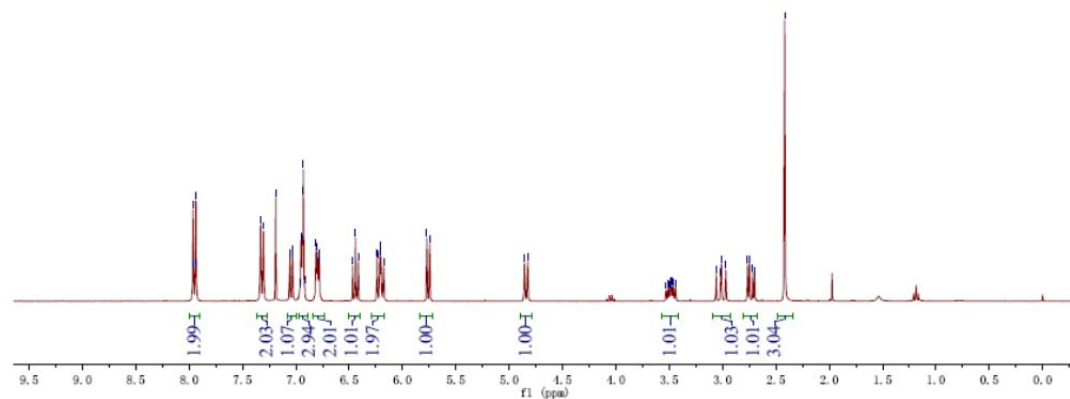

# <sup>13</sup>C NMR spectrum of **31**

Feb04-2015  
gio guo geh gc 77  
carbon\_256 CDC13 /opt/topap in av1 2

171.22  
145.96  
137.48  
136.89  
131.78  
130.03  
128.73  
128.69  
128.06  
127.16  
126.81  
105.53

77.47  
77.04  
76.62  
63.31  
51.38  
42.67  
21.85

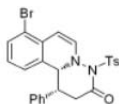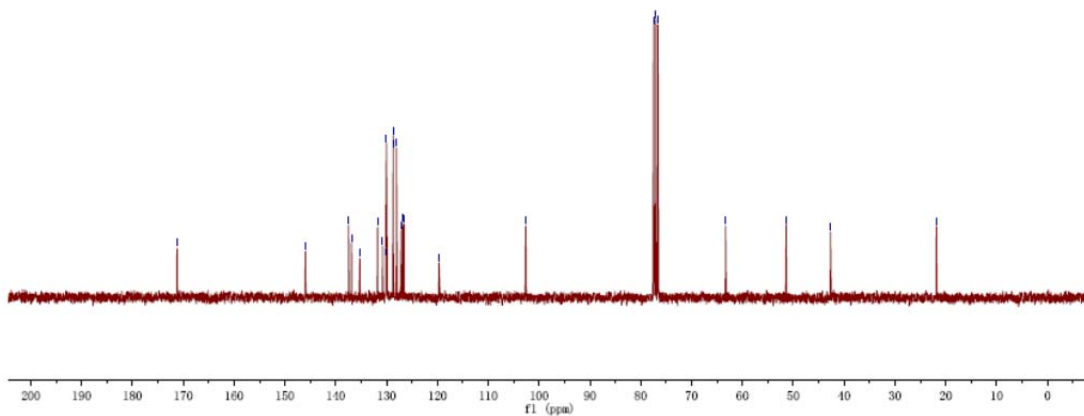

Supplement: 41557_2015_BFnchem2337_MOESM103_ESM.pdf [file 41557_2015_BFnchem2337_MOESM103_ESM.pdf]
