# Supplementary material for: Switchable selectivity in an NHC-catalysed dearomatizing annulation reaction
Source: Springer Nature journal article supplement (doi:10.1038/nchem.2337), 2015-08-31
Supplement: 41557_2015_BFnchem2337_MOESM104_ESM.pdf [file 41557_2015_BFnchem2337_MOESM104_ESM.pdf]

**Rac-3I**

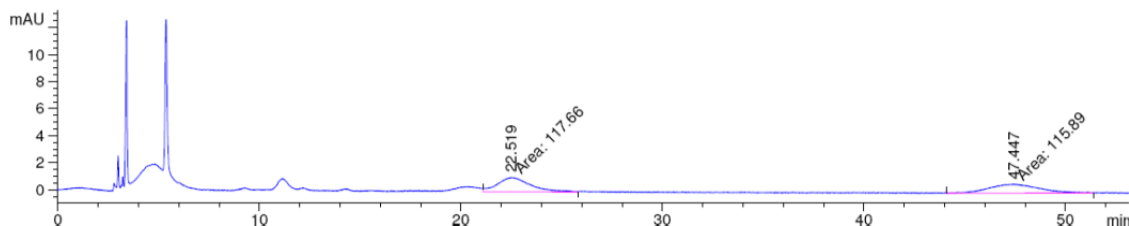

| Peak # | RetTime [min] | Type | Width [min] | Area [mAU*s] | Height [mAU] | Area %  |
|--------|---------------|------|-------------|--------------|--------------|---------|
| 1      | 22.519        | MM   | 1.8626      | 117.66046    | 1.05286      | 50.3790 |
| 2      | 47.447        | MM   | 2.8507      | 115.89037    | 6.77561e-1   | 49.6210 |

Totals : 233.55083 1.73042

**Asy-3I**

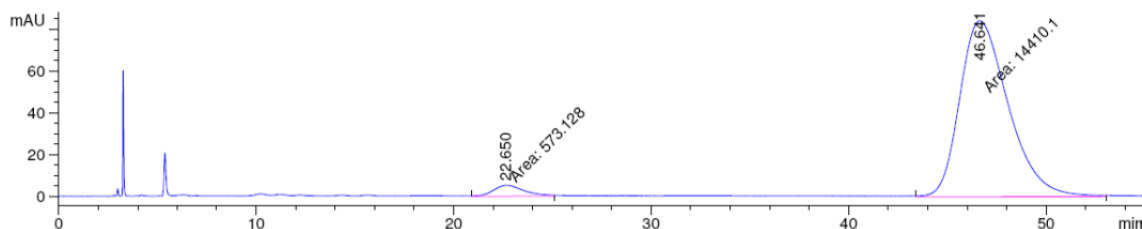

| Peak # | RetTime [min] | Type | Width [min] | Area [mAU*s] | Height [mAU] | Area %  |
|--------|---------------|------|-------------|--------------|--------------|---------|
| 1      | 22.650        | MM   | 1.8221      | 573.12805    | 5.24225      | 3.8251  |
| 2      | 46.641        | MM   | 2.8513      | 1.44101e4    | 84.23128     | 96.1749 |

Totals : 1.49833e4 89.47353
