# Supplementary figures and images for: Switchable selectivity in an NHC-catalysed dearomatizing annulation reaction
Source: Springer Nature journal article supplement (doi:10.1038/nchem.2337), 2015-08-31

# <sup>1</sup>H NMR spectrum of **3j**

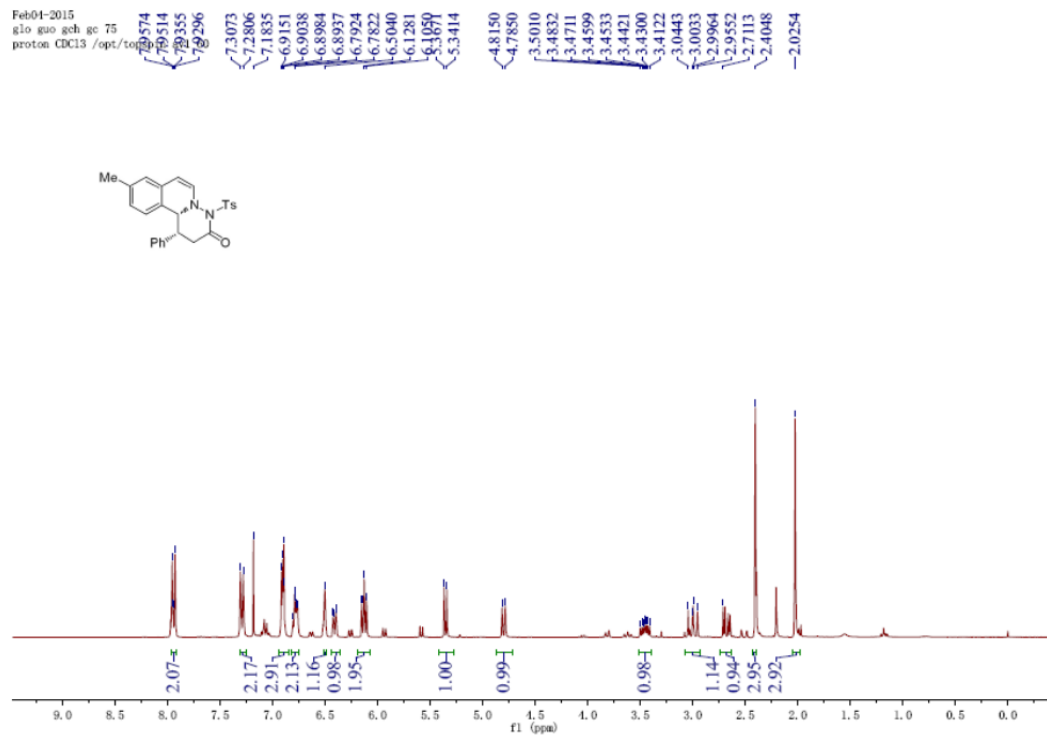

# <sup>13</sup>C NMR spectrum of **3j**

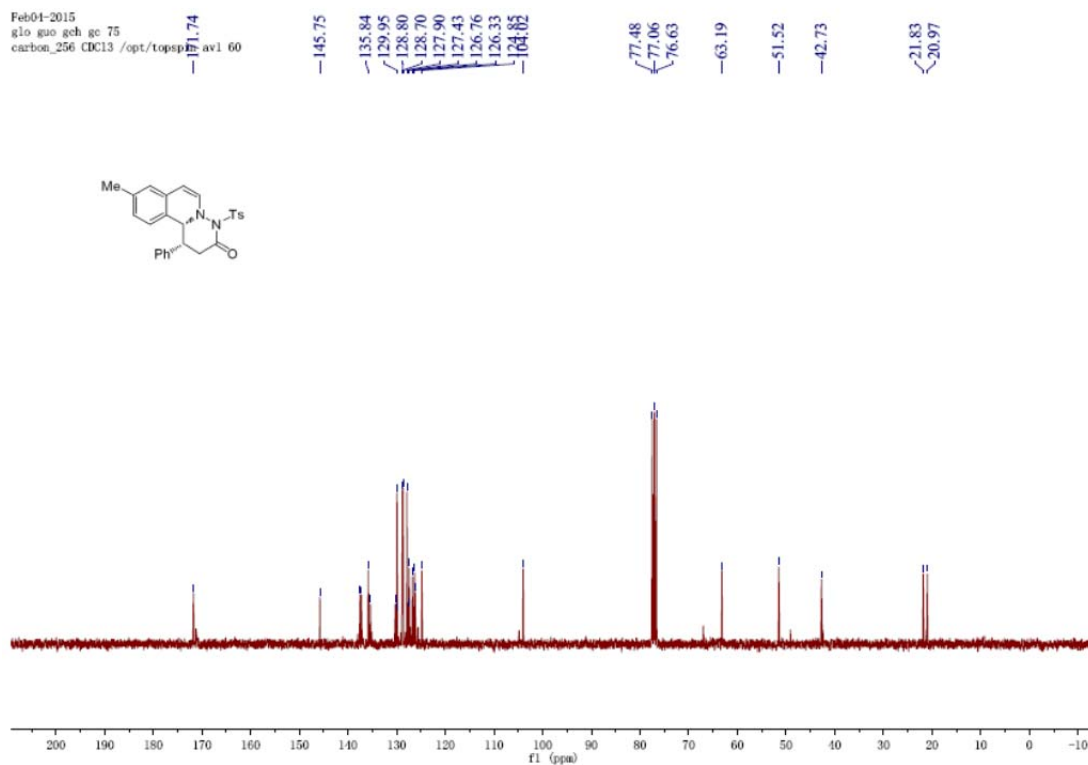

Supplement: 41557_2015_BFnchem2337_MOESM93_ESM.pdf [file 41557_2015_BFnchem2337_MOESM93_ESM.pdf]
